# Supplementary material for: Trends and risk of recurrent preterm birth in pregnancy cohorts in rural Bangladesh, 1990–2019
Source: PubMed Central journal article supplement — BMJ Glob Health. 2023 Nov 19;8(11):e012521. doi: 10.1136/bmjgh-2023-012521 (PMC10660812; doi:10.1136/bmjgh-2023-012521), 2023-11-19
Supplement: bmjgh-2023-012521supp001.pdf [file bmjgh-2023-012521supp001.pdf]

## Supplementary tables and figures

Table S1. Spearman correlation coefficient matrix of maternal characteristics

|                                      | <b>Maternal age in years</b> | <b>Education in years</b> | <b>Wealth quintiles</b> | <b>Birth interval in months</b> | <b>Calendar year of second birth</b> |
|--------------------------------------|------------------------------|---------------------------|-------------------------|---------------------------------|--------------------------------------|
| <b>Maternal age in years</b>         | 1                            | 0.103*                    | 0.063*                  | 0.372*                          | 0.133*                               |
| <b>Education in years</b>            | 0.103*                       | 1                         | 0.311*                  | 0.051*                          | 0.392*                               |
| <b>Wealth quintiles</b>              | 0.063*                       | 0.311*                    | 1                       | 0.009                           | 0.028*                               |
| <b>Birth interval in months</b>      | 0.372*                       | 0.051*                    | 0.009                   | 1                               | 0.223*                               |
| <b>Calendar year of second birth</b> | 0.133*                       | 0.392*                    | 0.028*                  | 0.223*                          | 1                                    |

\*P&lt;0.05

Table S2. Risk of recurrent preterm birth when all women in the first delivery were included regardless of whether they had a second delivery or not. Cox proportional hazards analysis (n=25,140, events=2118, censored=23,022).

| Gestational age at first birth (weeks) | No. of women followed-up | Events* |      | Unadjusted Hazards Ratio (95% confidence interval) | Adjusted Hazards Ratio (95% confidence interval) <sup>†‡</sup> |
|----------------------------------------|--------------------------|---------|------|----------------------------------------------------|----------------------------------------------------------------|
|                                        |                          | No.     | %    |                                                    |                                                                |
| <37                                    | 3848                     | 633     | 16.4 | 2.26 (2.06-2.48)                                   | 1.67 (1.52-1.85)                                               |
| ≥37                                    | 21292                    | 1485    | 7.0  | 1                                                  | 1                                                              |

\*Preterm birth in second pregnancy

<sup>†</sup>Adjusted for socioeconomic status by asset quintiles, maternal education, and year follow-up ended.

<sup>‡</sup>Schoenfeld residuals proportional hazard assumption  $P=0.086$

Table S3. Recurrent preterm birth risks stratified by study period in Matlab, Bangladesh, 1990 to 2019.

| Gestational age at birth (weeks) | 1990-1999   |                    |                                   | 2000-2009   |                    |                                   | 2010-2019   |                    |                                   |
|----------------------------------|-------------|--------------------|-----------------------------------|-------------|--------------------|-----------------------------------|-------------|--------------------|-----------------------------------|
|                                  | n (%)       | Crude OR (95% CI)  | Adjusted OR (95% CI) <sup>†</sup> | n (%)       | Crude OR (95% CI)  | Adjusted OR (95% CI) <sup>†</sup> | n (%)       | Crude OR (95% CI)  | Adjusted OR (95% CI) <sup>†</sup> |
| <32                              | 65 (2.0)    | 3.72 (2.24 – 6.19) | 3.64 (2.18 – 6.07)                | 72 (1.3)    | 5.47 (3.33 – 8.96) | 5.29 (3.21 – 8.73)                | 43 (0.8)    | 2.95 (1.40 – 6.19) | 2.92 (1.39 – 6.15)                |
| 32-33                            | 172 (5.3)   | 3.06 (2.19 – 4.28) | 3.02 (2.15 – 4.22)                | 170 (3.0)   | 4.50 (3.19 – 6.35) | 4.12 (2.91 – 5.83)                | 87 (1.5)    | 3.54 (2.14 – 5.86) | 3.54 (2.14 – 5.88)                |
| 34-36                            | 675 (21.0)  | 1.86 (1.50 – 2.30) | 1.84 (1.48 – 2.28)                | 767 (13.7)  | 2.75 (2.24 – 3.39) | 2.55 (2.07 – 3.15)                | 464 (7.9)   | 2.90 (2.26 – 3.74) | 2.89 (2.24 – 3.72)                |
| 37-38                            | 791 (24.6)  | 1.57 (1.27 – 1.93) | 1.55 (1.26 – 1.92)                | 1367 (24.4) | 1.92 (1.59 – 2.31) | 1.8 (1.53 – 2.22)                 | 1350 (23.7) | 1.72 (1.41 – 2.09) | 1.72 (1.41 – 2.08)                |
| ≥39*                             | 1515 (47.1) | 1                  | 1                                 | 3233 (57.6) | 1                  | 1                                 | 3796 (66.1) | 1                  | 1                                 |

<sup>†</sup>Adjusted for maternal education, socioeconomic status by wealth quintiles, and calendar year of second birth

\*Reference category

Table S4. Recurrent spontaneous preterm birth odds in second pregnancy by spontaneous and indicated preterm birth in first pregnancy in Matlab, Bangladesh, 2005 to 2019.

| Gestational age at birth (weeks) in first pregnancy | Spontaneous preterm birth odds in second pregnancy |                           |                                             |                                                            |
|-----------------------------------------------------|----------------------------------------------------|---------------------------|---------------------------------------------|------------------------------------------------------------|
|                                                     | <37 Gestational weeks (n)                          | ≥37 Gestational weeks (n) | Crude odds ratio (95% confidence intervals) | Adjusted odds ratio (95% confidence interval) <sup>†</sup> |
| <37, spontaneous (n)                                | 87                                                 | 322                       | 2.81 (2.18 – 3.63)                          | 3.13 (2.40 – 4.07)                                         |
| <37, induced (n)                                    | 1                                                  | 4                         | 2.60 (0.29 – 23.34)                         | 3.00 (0.33 – 27.04)                                        |
| ≥37* (n)                                            | 464                                                | 4831                      | 1                                           | 1                                                          |

<sup>†</sup>adjusted for maternal education, socioeconomic status by wealth quintiles, and calendar year of second birth

\*reference category

Table S5. Recurrent indicated preterm birth odds in second pregnancy by spontaneous and indicated preterm birth in first pregnancy in Matlab, Bangladesh, 2005 to 2019.

| Gestational age at birth (weeks) in first pregnancy | Indicated preterm birth odds in second pregnancy |                           |                                             |                                                            |
|-----------------------------------------------------|--------------------------------------------------|---------------------------|---------------------------------------------|------------------------------------------------------------|
|                                                     | <37 Gestational weeks (n)                        | ≥37 Gestational weeks (n) | Crude odds ratio (95% confidence intervals) | Adjusted odds ratio (95% confidence interval) <sup>†</sup> |
| <37, spontaneous (n)                                | 13                                               | 72                        | 1.28 (0.70 – 2.34)                          | 1.23 (0.67 – 2.26)                                         |
| <37, induced (n)                                    | 29                                               | 73                        | 2.82 (1.80 – 4.41)                          | 2.73 (1.75 – 4.29)                                         |
| ≥37* (n)                                            | 287                                              | 2035                      | 1                                           | 1                                                          |

<sup>†</sup>adjusted for maternal education, socioeconomic status by wealth quintiles, and calendar year of second birth

\*reference category

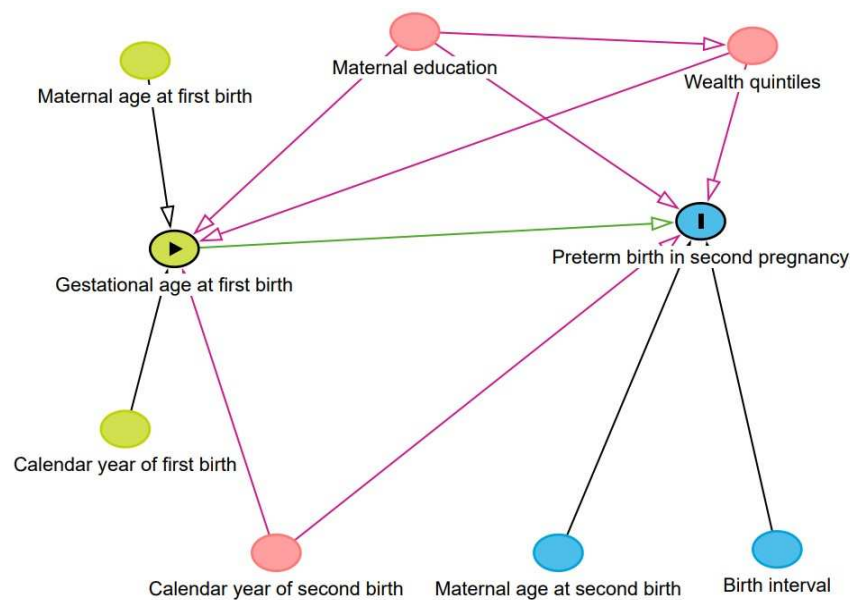

Figure S1: Directed acyclic graph showing exposure, outcome and other observed covariates. The exposure is marked green with an arrow; the outcome is marked blue with a vertical line; the ancestors of the outcome are marked blue; the ancestors of outcome and exposure are marked red.

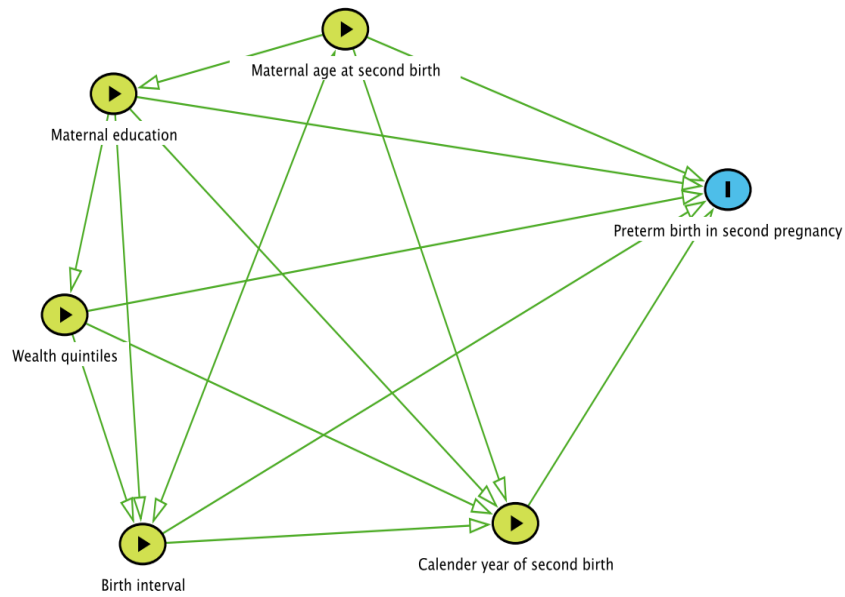

Figure S2: Directed acyclic graph showing exposures and outcome. Exposures are marked green with an arrow, and the outcome is marked as blue with a vertical line.

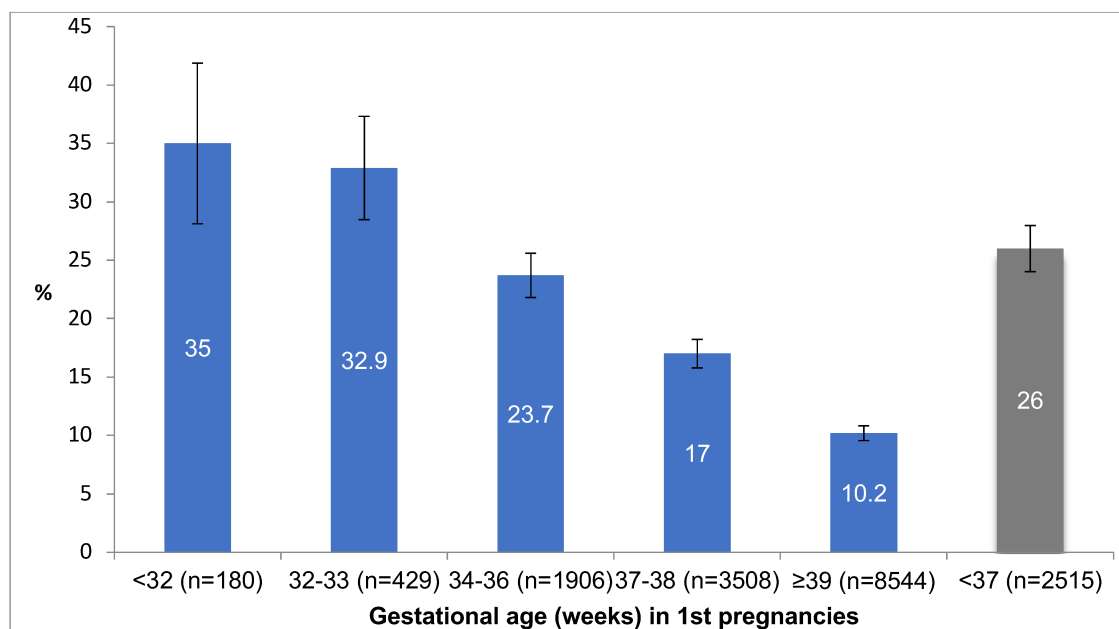

Figure S3. Proportion of preterm birth in second pregnancy based on the gestational age at delivery in first pregnancy in Matlab, Bangladesh, 1990 to 2019
